# Supplementary material for: Measuring the shape of the biodiversity-disease relationship across systems reveals new findings and key gaps
Source: PubMed Central journal article supplement (PMC6834853; doi:10.1038/s41467-019-13049-w), 2019-11-06
Supplement: 41467_2019_13049_MOESM4_ESM.pdf [file 41467_2019_13049_MOESM4_ESM.pdf]

## **Description of Additional Supplementary Files**

File Name: Supplementary Data 1

Description: Akaike information criterion (AIC), Bayesian information criterion (BIC), and  $R^2$  for each model fit to each biodiversity-disease relationship
